# Supplementary material for: Synthesis and characterization of chiral PEDOT enantiomers bearing chiral moieties in side chains: chiral recognition and its mechanism using electrochemical sensing technology
Source: Royal Society of Chemistry journal article supplement (doi:10.1039/c5ra20871h), 2016-01-01
Supplement: c5ra20871h1.pdf [file c5ra20871h1.pdf]

## Supporting Information

**Synthesis and characterization of chiral PEDOTs enantiomers bearing chiral moieties in side chains: chiral recognition and its mechanism using electrochemical sensing technology**

**Liqi Dong, Long Zhang, Xuemin Duan\*, Jingkun Xu\*, Xiaofei Zhu, Daize Mo**

School of Pharmacy, Jiangxi Science & Technology Normal University, Nanchang, 330013, China

**Corresponding author:**

\* E-mail: duanxuemin@126.com, xujingkun@tsinghua.org.cn, Fax: +86-791-83823320, Tel.: +86-

791-88537967

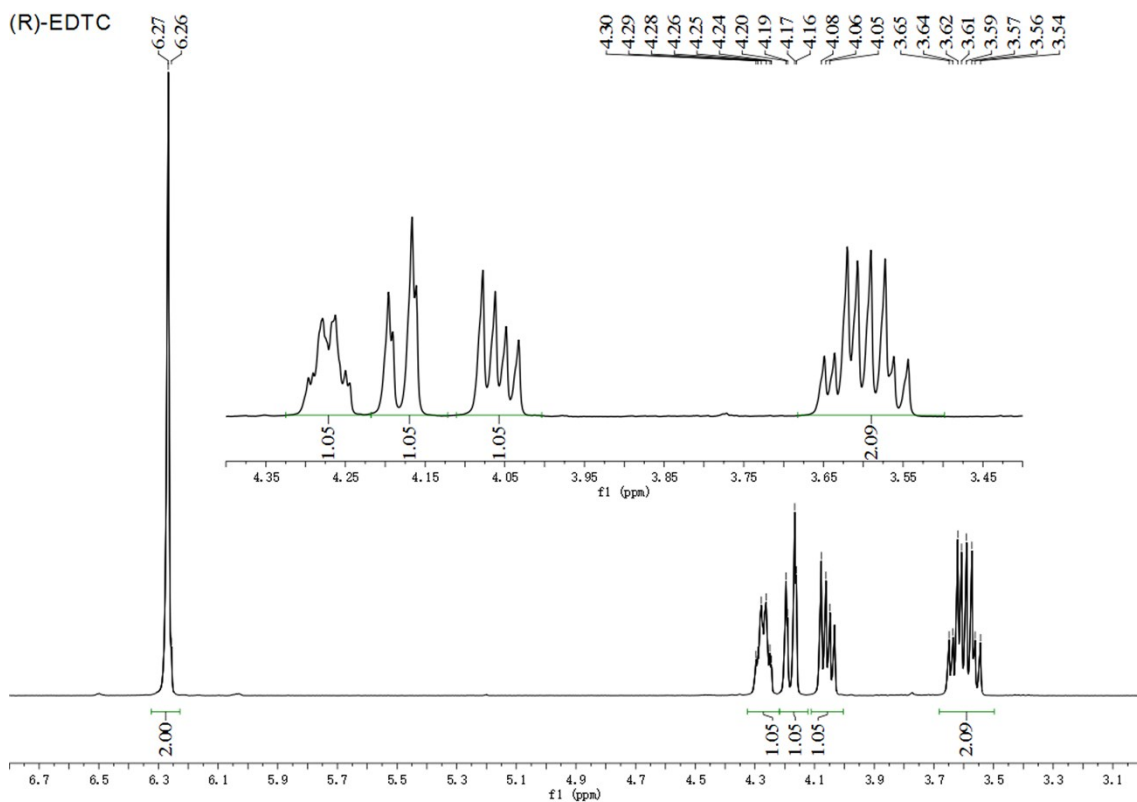

Figure S1.  $^1\text{H}$  NMR spectrum of (R)-EDTC

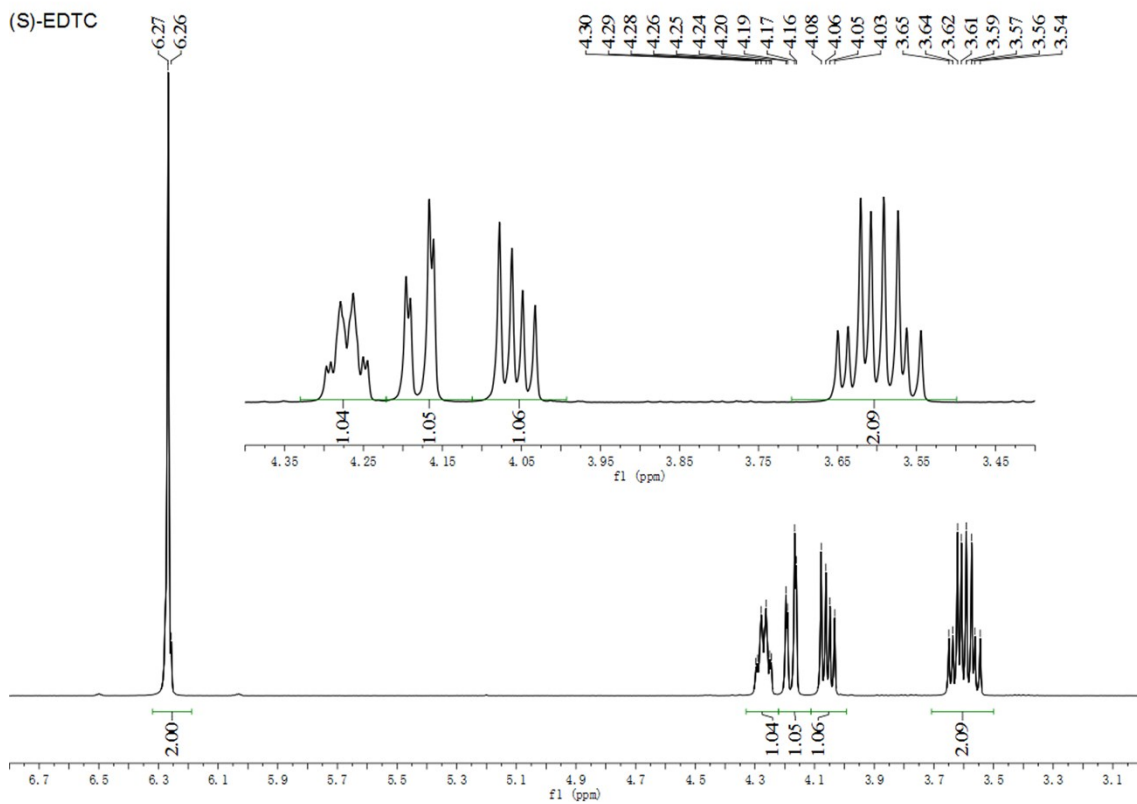

Figure S2.  $^1\text{H}$  NMR spectrum of (S)-EDTC

**Table S1.** Assignment for FT-IR Spectra of (*R*)-EDTC, (*R*)-PEDTC, (*S*)-EDTC and (*S*)-PEDTC.

| Band (cm <sup>-1</sup> )  |                    |                           |                    | Assignment                      |
|---------------------------|--------------------|---------------------------|--------------------|---------------------------------|
| ( <i>R</i> )-EDTC         | ( <i>R</i> )-PEDTC | ( <i>S</i> )-EDTC         | ( <i>S</i> )-PEDTC |                                 |
| 3111                      | ----               | 3111                      | ----               | $\nu$ =C-H                      |
| 3019, 2995, 2963,<br>2926 | 2928               | 3017, 2997, 2963,<br>2930 | 3012               | $\nu$ CH <sub>2</sub>           |
| 1575, 1482                | 1617, 1479         | 1581, 1483, 1426          | 1618, 1511         | $\nu$ C=C                       |
| 1374, 1341, 1275          | 1398, 1313         | 1375, 1339, 1275          | 1399, 1329         | $\nu_{as}$ =C-O-C/ $\nu$<br>C-C |
| 1186, 1137, 1102          | 1186               | 1188, 1134, 1099          | 1171               | $\nu_{as}$ C-O                  |
| 1055                      | 1083               | 1055                      | 1073               | $\nu_s$ =C-O-C                  |
| 1021                      | ----               | 1016                      | ----               | $\delta$ =C-H                   |
| 919                       | ----               | 920                       | ----               | $\gamma$ =C-H                   |
| 845                       | 875                | 850                       | 836                | $\nu_s$ C-O                     |
| 773                       | 760                | 775                       | 762                | $\nu$ C-Cl                      |
| 689                       | 619                | 687                       | 617                | $\nu$ C-S                       |
| 542                       | 534                | 538                       | 542                | $\delta$ C-Cl                   |

$\nu$  represents stretching vibration ( $\nu_a$  symmetrical;  $\nu_{as}$  asymmetrical),  $\delta$  in-plane deformation vibration and  $\gamma$  out-of-plane deformation vibration.

**Table S2.** Thermogravimetric Parameters for (*R*)-PEDTC and (*S*)-PEDTC.

| Polymer films      | Temperature range (K) | Weight loss (%) |
|--------------------|-----------------------|-----------------|
|                    | 298-448               | 3.55            |
| ( <i>R</i> )-PEDTC | 449-654               | 37.42           |
|                    | 655-1260              | 33.72           |
|                    | 298-448               | 2.44            |
| ( <i>S</i> )-PEDTC | 449-654               | 38.65           |
|                    | 655-1260              | 29.96           |
